# Supplementary material for: Migration of copper species in CexCu1−xO2 catalyst driven by thermal treatment and the effect on CO oxidation
Source: Royal Society of Chemistry journal article supplement (doi:10.1039/c7cp03735j), 2017-01-01
Supplement: c7cp03735j1.pdf [file c7cp03735j1.pdf]

## Migration of copper species in $Ce_xCu_{1-x}O_2$ catalyst driven by thermal treatment and the effect on CO oxidation

Yan Xiong,<sup>a,b</sup> Lulu Li,<sup>a</sup> Lei Zhang,<sup>d</sup> Yuan Cao,<sup>a</sup> Shuohan Yu,<sup>a</sup> Changjin Tang,<sup>\*a</sup> Lin Dong<sup>\*a,c</sup>

Supplementary materials:

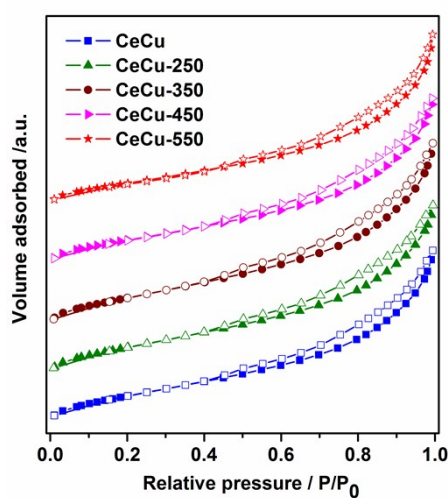

**Figure S1.** The  $N_2$  adsorption-desorption isotherms of the catalysts.

**Table S1.** Textural parameters of the catalysts determined by BET.

| Sample                                        | CeO <sub>2</sub> | CeCu  | CeCu-250 | CeCu-350 | CeCu-450 | CeCu-550 |
|-----------------------------------------------|------------------|-------|----------|----------|----------|----------|
| Surface area /m <sup>2</sup> .g <sup>-1</sup> | 26.0             | 66.4  | 66.7     | 68.2     | 63.4     | 57.9     |
| Pore Volume /cm <sup>3</sup> .g <sup>-1</sup> | 0.044            | 0.103 | 0.103    | 0.108    | 0.101    | 0.097    |
| Average Pore Size /nm                         | 6.75             | 6.17  | 6.15     | 6.35     | 6.38     | 6.67     |

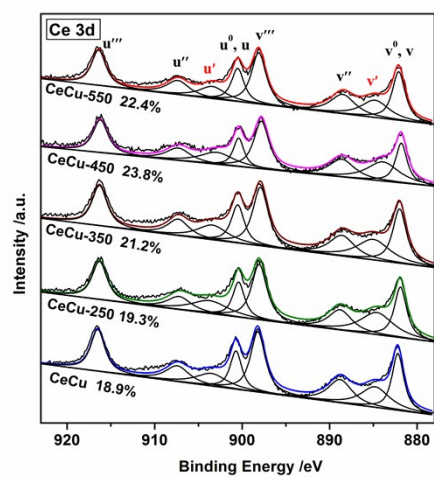

**Figure S2.** Ce 3d spectra and the Ce<sup>3+</sup>% of the catalysts determined by XPS.
